# Supplementary material for: Substitution effect on the hydrofluorination reaction of unsaturated amines in superacid HF/SbF5
Source: Royal Society of Chemistry journal article supplement (doi:10.1039/b915077c), 2009-01-01

## SUPPORTING INFORMATION

### **Substitution effect on the Hydrofluorination reaction of unsaturated amines in superacid HF/SbF<sub>5</sub>**

**Fei Liu,<sup>a</sup> Agnès Martin-Mingot,<sup>a</sup> Marie-Paule Jouannetaud,<sup>a</sup> Omar Karam<sup>b</sup> and Sébastien Thibaudeau<sup>\*a</sup>**

<sup>a</sup> *Laboratoire "Synthèse et Réactivité des Substances Naturelles", UMR 6514, 40, avenue du Recteur Pineau, F-86022 Poitiers Cedex, France. Fax: 33-549453501; Tel: 33-549453702; [sebastien.thibaudeau@univ-poitiers.fr](mailto:sebastien.thibaudeau@univ-poitiers.fr)*

<sup>b</sup> *@rtMolecule, 40, avenue du Recteur Pineau, F-86022 Poitiers Cedex, France. Fax/ Tel: 33-549454121; [contact@artmolecule.fr](mailto:contact@artmolecule.fr)*

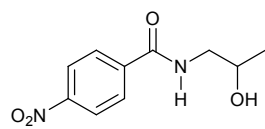

compound 2'a

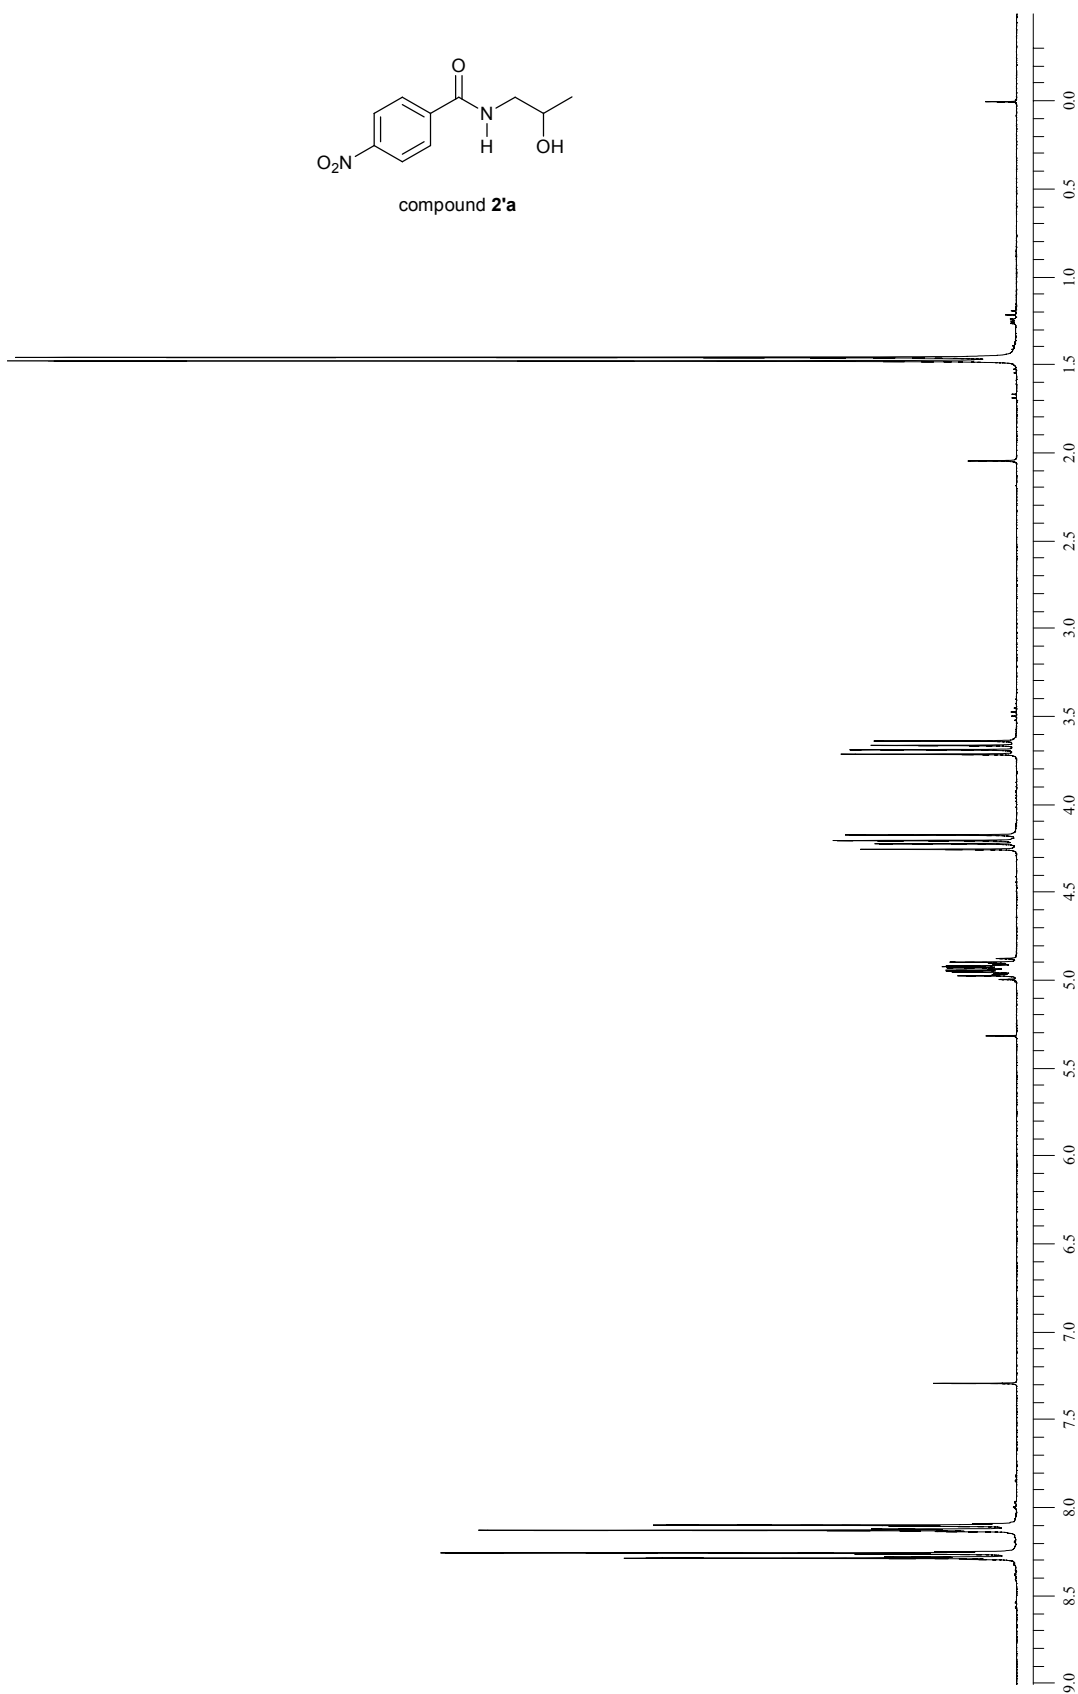

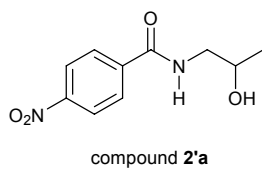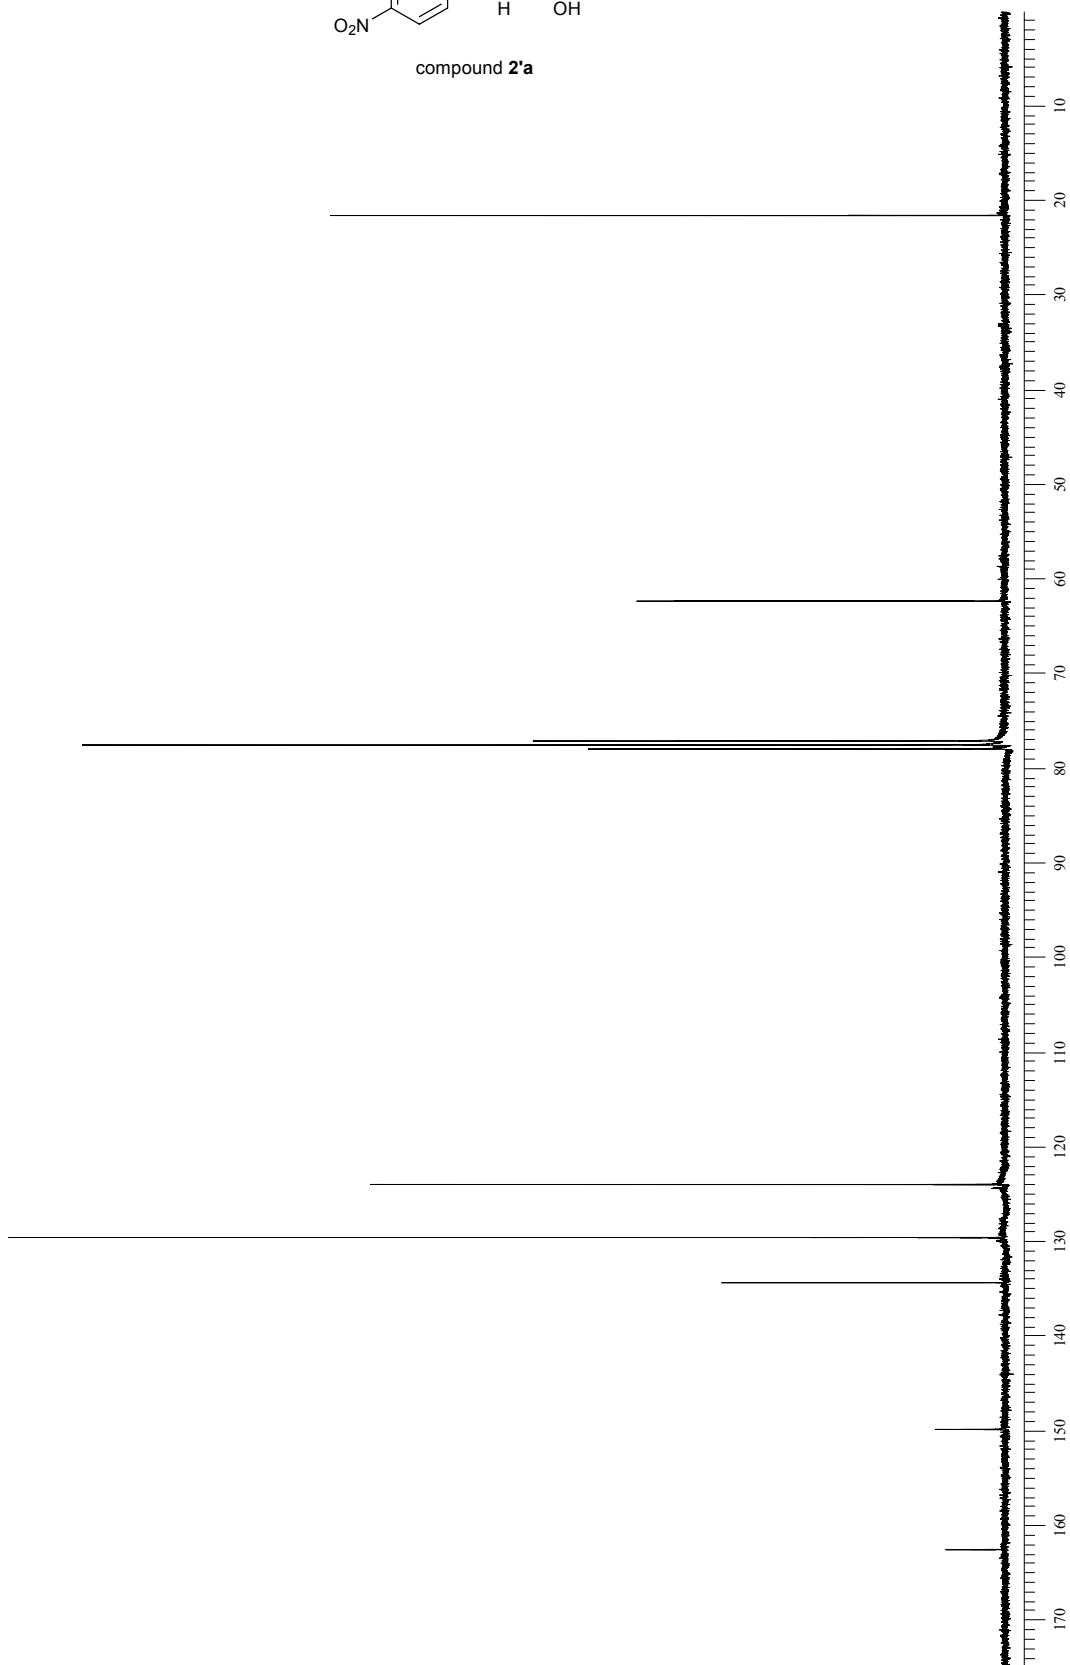

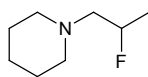

compound **2b**

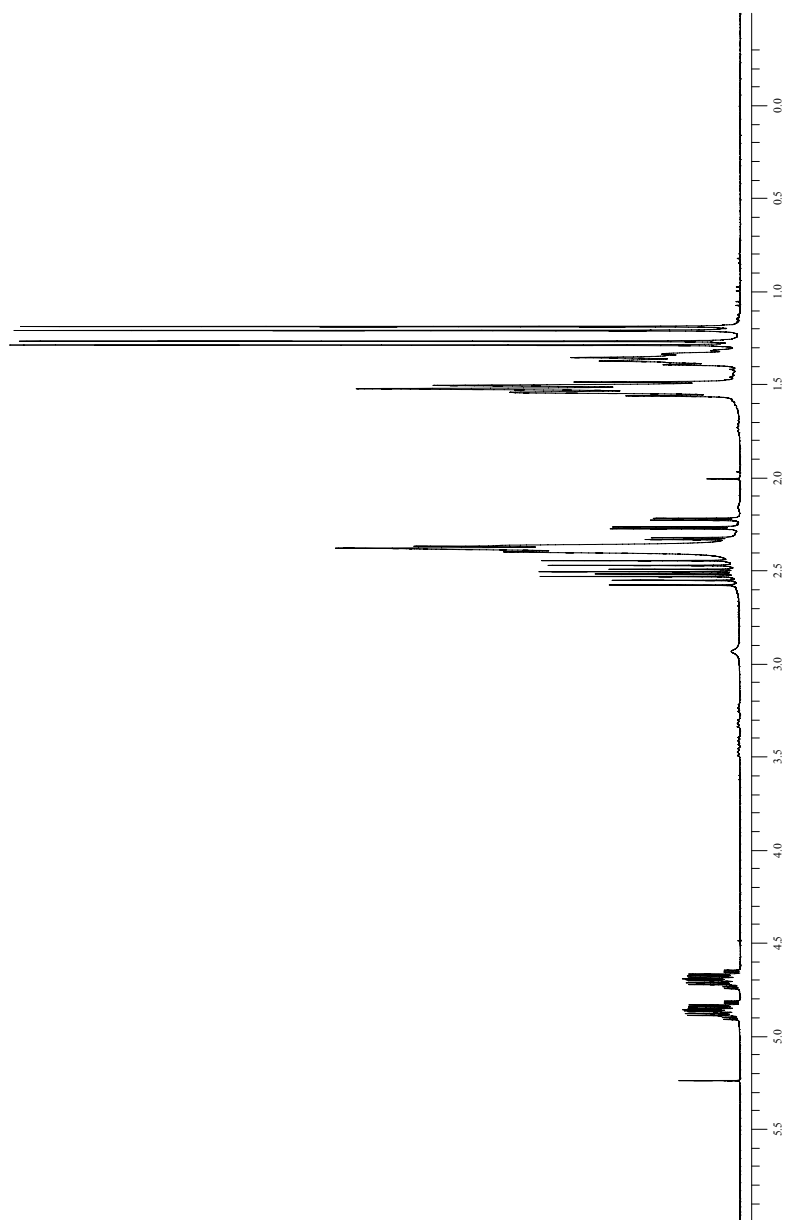

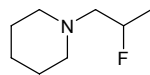

compound **2b**

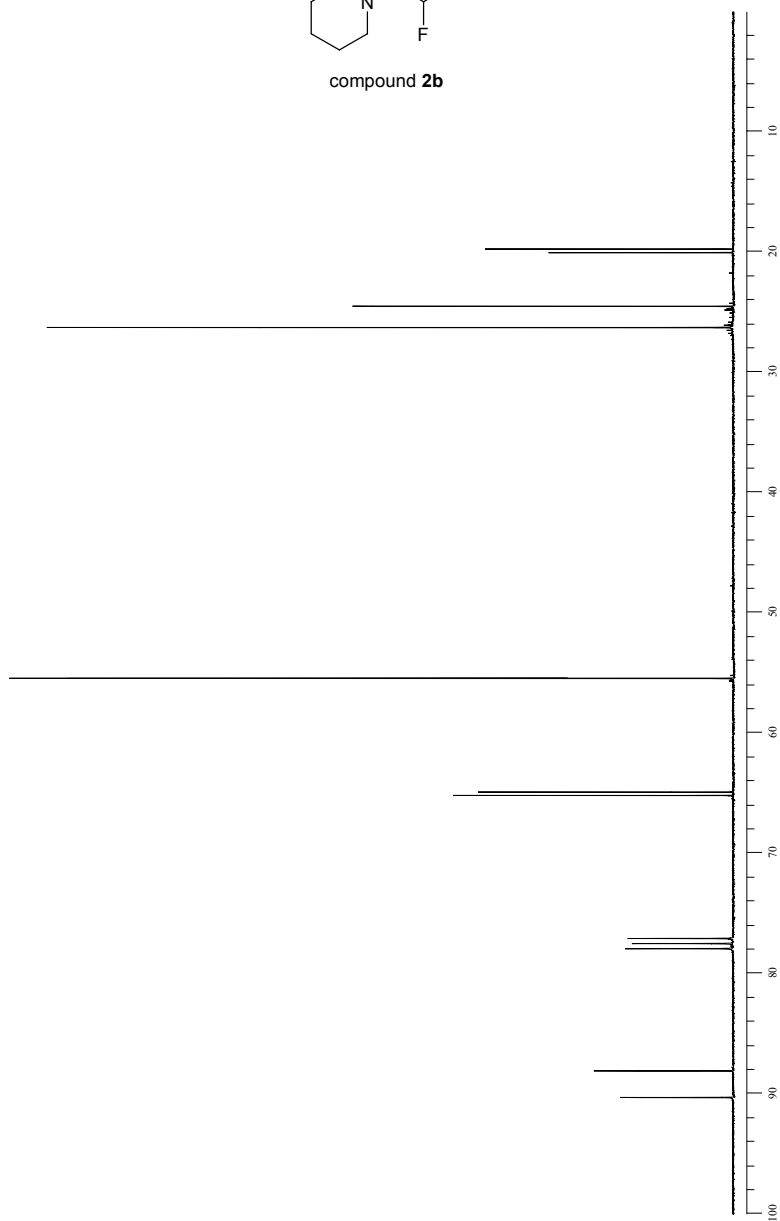

Supplement: b915077c.pdf [file b915077c.pdf]
